# Supplementary material for: Protein-free ribosomal RNA scaffolds can assemble poly-lysine oligos from charged tRNA fragments
Source: PubMed Central journal article supplement — Biochem Biophys Res Commun. Author manuscript; Available in PMC 2021 Mar 12. (PMC7936610; doi:10.1016/j.bbrc.2021.01.036), 2021-02-03
Supplement: NIHMS1669599-supplement-1.pdf [file NIHMS1669599-supplement-1.pdf]

Supporting information for:

Protein-Free ribosomal RNA scaffolds can assemble poly-lysine oligos from charged tRNA fragments

Doris Xu<sup>1</sup>, Yuhong Wang<sup>2\*</sup>

<sup>1</sup>Department of Bioengineering, University of Pennsylvania, Philadelphia, PA 19104, USA ()

<sup>2</sup>Department of Biology and Biochemistry, University of Houston, Houston, TX 77204, USA

Correspondence and requests for materials should be addressed to Y.W.

([ywang60@uh.edu](mailto:ywang60@uh.edu))

Table of contents:

| Content   | page |
|-----------|------|
| Title     | 1    |
| Figure S1 | 2    |
| Figure S2 | 3    |
| Figure S3 | 4    |
| Figure S4 | 5    |
| Table S1  | 6    |
| Table S2  | 6    |
| Reference | 7    |

Figure S1

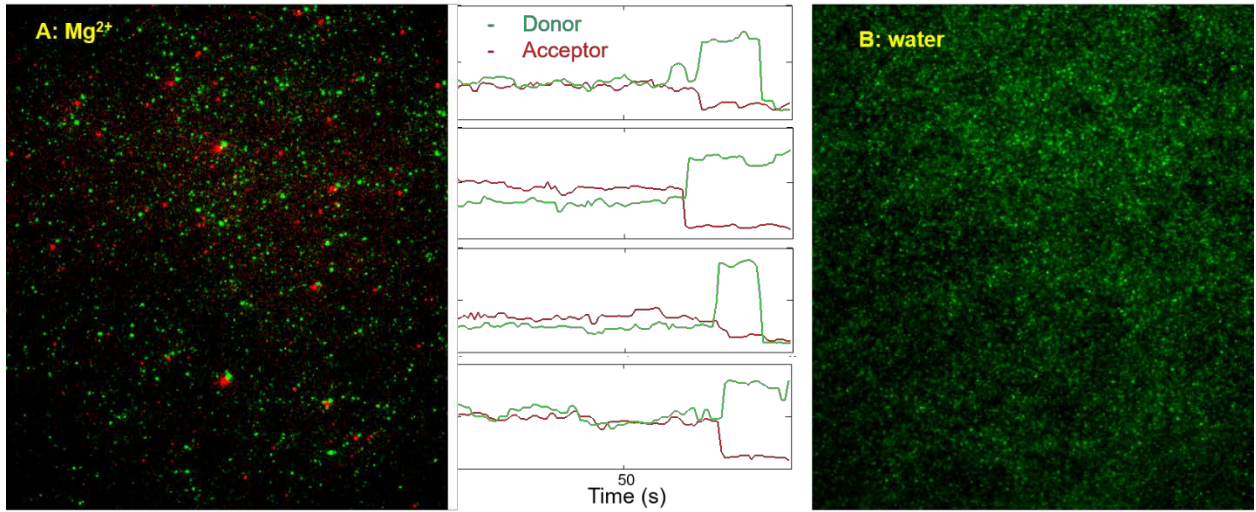

**Figure S1.** Examples of smFRET images and fitted fluorescence intensity time-lapse traces: (A) in the presence (high FRET formed) and (B) absence of  $Mg^{2+}$  (no FRET). The Cy3/Cy5 labels are shown in Figure 2. There are two type of Cy3/Cy5 experiments, both showed the similar images as above.

Figure S2.

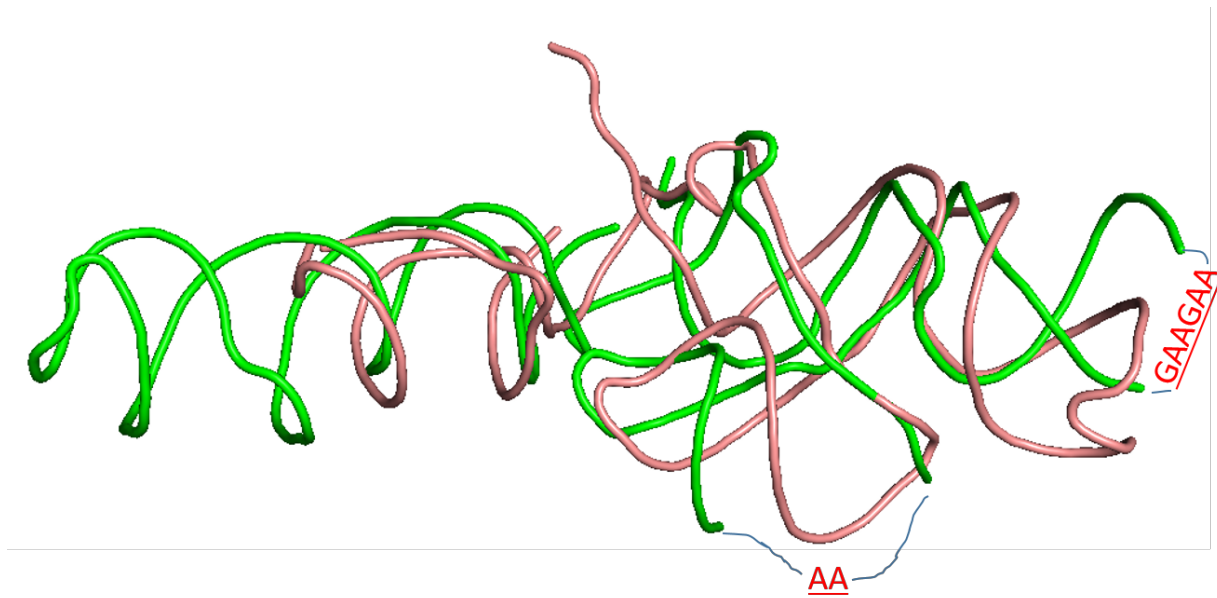

**Figure S2.** Alignment of ptc1b (red) onto ptc1a (green) fragments. Two long stems in ptc1a are truncated and replaced with the sequence of ptc1b.

Figure S3

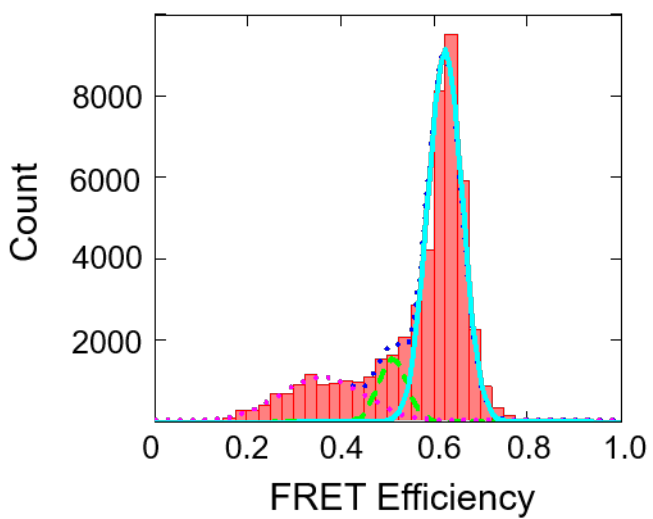

**Figure S3.** FRET efficiency histogram of heterodimer between ptc1a-Cy3 and ptc1b-Cy5. Both fragments are labeled at 3'-end. But one is labeled with Cy3 and the other one is labeled with Cy5.

Figure S4

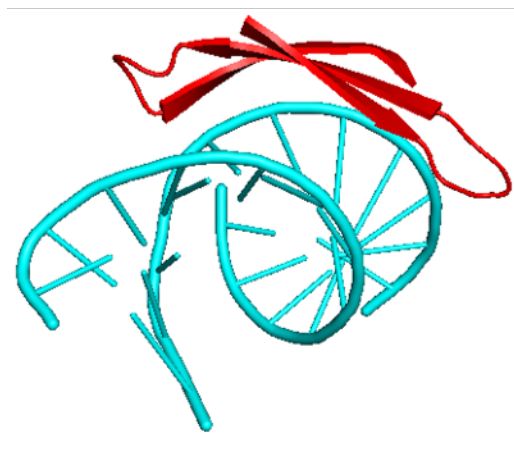

L15-5S

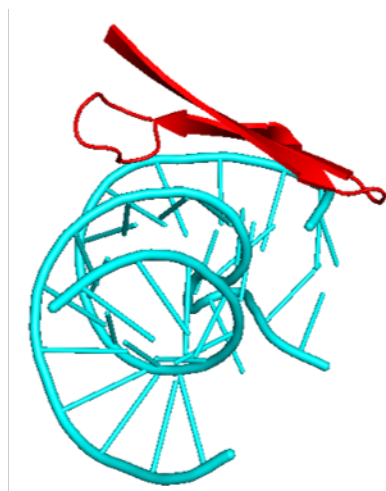

S11-16S

**Figure S4.** RNA duplex and protein b-sheet interactions between L15 and 5S; and between S11 and 16S. These 3D interactions are similar regardless of little sequence resemblance.

Table S1. Theoretical and measured Mass and analysis. Except for the substrates, only the N<sup>14</sup>, N<sup>14</sup>-lysine products are shown. The N<sup>15</sup>,N<sup>15</sup>-lysine products shift +18 in all the mass spectrum.

| species                           | Theoretical<br>Mass (M+1) | Measured<br>Mass | Difference | Assignment of difference<br>(theoretical Mass)                                                         |
|-----------------------------------|---------------------------|------------------|------------|--------------------------------------------------------------------------------------------------------|
| ACCCACCA-<br>K <sup>N14,N14</sup> | 2581.6                    | 2579.6           | -2         |                                                                                                        |
| ACCCACCA-<br>K <sup>N15,N15</sup> | 2583.6                    | 2581.5           | -2         |                                                                                                        |
| CCA-K <sub>9</sub>                | 2033.7                    | 1897.3           | -136.4     | A <sub>base</sub> (135.1) <sup>1</sup>                                                                 |
| ACCA- K <sub>9</sub>              | 2362.7                    | 2273.4           | -89.3      | - A <sub>base</sub> (135.1) <sup>1</sup> -OH(17) <sup>2</sup><br>+PO <sub>2</sub> (63) <sup>3, 4</sup> |
| CCACCA- K <sub>9</sub>            | 2972.7                    | 2931.5           | -41.2      | CO <sub>2</sub> (44) <sup>5</sup> ;                                                                    |
| CCCACCA- K <sub>9</sub>           | 3276.8                    | 3189.5           | -87.3      | - A <sub>base</sub> (135.1) <sup>1</sup> -OH(17) <sup>2</sup><br>+PO <sub>2</sub> (63) <sup>3, 4</sup> |

Table S2. Theoretical and measured tandem MS/MS on 2273 (ACCA-K<sub>9</sub>) and analysis. Only the N<sup>14</sup>, N<sup>14</sup>-lysine product 2273 MS/MS peaks are shown. The N<sup>15</sup>,N<sup>15</sup>-lysine products 2291 MS/MS peaks shift +18 relative those of un-labeled spectra.

| species                             | Theoretical<br>Mass (M+1) | Measured<br>Mass | Difference |
|-------------------------------------|---------------------------|------------------|------------|
| 2273-C <sub>base</sub> <sup>1</sup> | 2161.9                    | 2162.2           | +0.3       |
| 2273-A <sub>base</sub> <sup>1</sup> | 2137.9                    | 2138.2           | +0.3       |
| 2273-A                              | 1943.8                    | 1944.1           | +0.3       |
| 2273-AC                             | 1638.6                    | 1638.2           | -0.4       |

Reference:

- [1] Andersen, T. E., Kirpekar, F., and Haselmann, K. F. (2006) RNA fragmentation in MALDI mass spectrometry studied by H/D-exchange: mechanisms of general applicability to nucleic acids, *J Am Soc Mass Spectrom* 17, 1353-1368.
- [2] Banerjee, S., and Mazumdar, S. (2012) Selective deletion of the internal lysine residue from the peptide sequence by collisional activation, *J Am Soc Mass Spectrom* 23, 1967-1980.
- [3] Joyner, J. C., Keuper, K. D., and Cowan, J. A. (2013) Analysis of RNA cleavage by MALDI-TOF mass spectrometry, *Nucleic Acids Res* 41, e2.
- [4] Ni, J., Pomerantz, C., Rozenski, J., Zhang, Y., and McCloskey, J. A. (1996) Interpretation of oligonucleotide mass spectra for determination of sequence using electrospray ionization and tandem mass spectrometry, *Anal Chem* 68, 1989-1999.
- [5] Shek, P. Y., Zhao, J., Ke, Y., Siu, K. W., and Hopkinson, A. C. (2006) Fragmentations of protonated arginine, lysine and their methylated derivatives: concomitant losses of carbon monoxide or carbon dioxide and an amine, *J Phys Chem A* 110, 8282-8296.
